# Supplementary material
Source: PubMed Central journal article supplement (PMC1867364)
Supplement: plntcell_tpc.106.048637_1.pdf [file plntcell_tpc.106.048637_1.pdf]

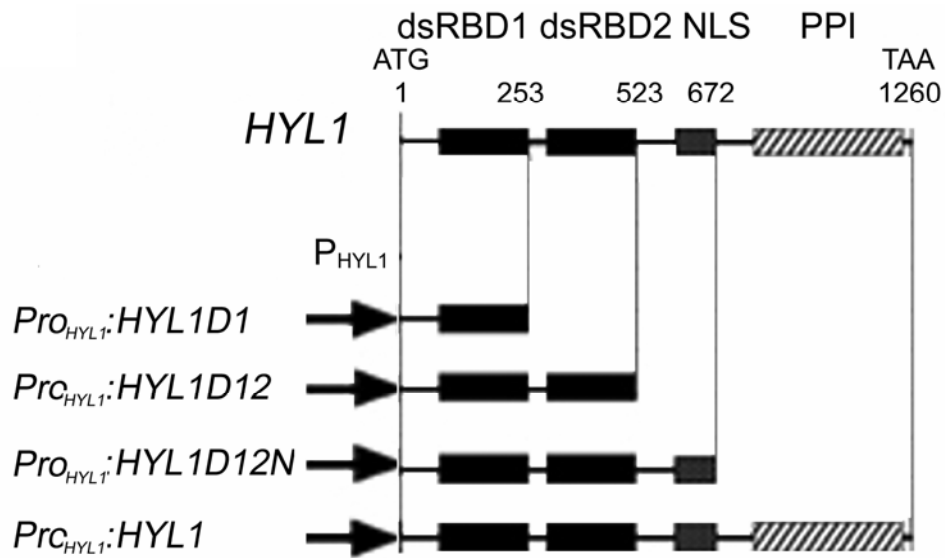

**Supplemental Figure 1.** Diagrams of the constructs with deletion mutants of *HYL1* gene under the control of the native promoter of *HYL1*. The locations of the four conserved domains (dsRBD1, dsRBD2, NLS and PPI) are indicated in squares (at the top). The positions of the first and the last nucleotides in deletion mutants are numbered from the initial ATG (above *HYL1* protein diagram). The constructs of  $Pro_{HYL1}:HYL1D1$ ,  $Pro_{HYL1}:HYL1D12$ ,  $Pro_{HYL1}:HYL1D12N$  and  $Pro_{HYL1}:HYL1$  are diagrammed.
