# Supplementary material
Source: PubMed Central journal article supplement (PMC1867364)
Supplement: plntcell_tpc.106.048637_2.pdf [file plntcell_tpc.106.048637_2.pdf]

**Supplemental Table 1.** Phenotype rescue of *hyll* mutants by deletion mutants of *HYL1* within T1 populations\*

| Deletion mutants  | Plants observed | Plants rescued | Percentage of rescue | Percentage of non-rescue |
|-------------------|-----------------|----------------|----------------------|--------------------------|
| <i>HYL1</i>       | 112             | 81             | 72                   | 28                       |
| <i>HYL1D1</i>     | 89              | 0              | 0                    | 100                      |
| <i>HYL1D12</i>    | 146             | 124            | 85                   | 15                       |
| <i>HYL1D12N</i>   | 121             | 110            | 91                   | 9                        |
| <i>HYL1D2N</i>    | 22              | 0              | 0                    | 100                      |
| <i>HYL1D2NP</i>   | 13              | 0              | 0                    | 100                      |
| <i>HYL1D12P</i>   | 65              | 55             | 84                   | 16                       |
| <i>HYL1D2NP</i>   | 21              | 0              | 0                    | 100                      |
| <i>HYL1D12P</i>   | 17              | 12             | 72                   | 28                       |
| <i>H-HYL1</i>     | 34              | 26             | 81                   | 19                       |
| <i>H-HYL1D1</i>   | 18              | 0              | 0                    | 100                      |
| <i>H-HYL1D12</i>  | 33              | 26             | 79                   | 21                       |
| <i>H-HYL1D12N</i> | 12              | 9              | 75                   | 25                       |

\* *HYL1D1* (corresponding to HYL1 lacking its dsRBD2, NLS and PPI domain), *HYL1D12* (HYL1 lacking its NLS and PPI), *HYL1D12N* (HYL1 lacking its PPI), *HYL1D2N* (HYL1 lacking its N-terminal dsRBD1 and PPI), *HYL1D2NP* (HYL1 lacking its N-terminal dsRBD1) and *HYL1D12P* (HYL1 lacking its NLS) under the control of the 35S promoter.

*H-HYL1* (corresponding to HYL1), *H-HYL1D1* (corresponding to HYL1 lacking its dsRBD2, NLS and PPI), *H-HYL1D12* (HYL1 lacking its NLS and PPI), and *H-HYL1D12N* (HYL1 lacking its PPI) under the control of the native promoter of *HYL1*.
