# Supplementary material
Source: PubMed Central journal article supplement (PMC1867364)
Supplement: plntcell_tpc.106.048637_3.pdf [file plntcell_tpc.106.048637_3.pdf]

**Supplemental Table 2.** Primer sequences

| <b>Primer</b>      | <b>Primer Sequence (5'-3')</b>     |
|--------------------|------------------------------------|
| <b>HYL1-5</b>      | CAAGGATCCACAATGACCTCCACTGATGT      |
| <b>HYL1-3</b>      | AAGTCGACTTATGCGTGGCTTGCTTCT        |
| <b>HYL1D1-3</b>    | AAGTCGACTTAGGATTTTGCTAATTC         |
| <b>HYL1D12-3</b>   | AAGTCGACTTATTCTGACTGGATCGCT        |
| <b>HYL1D12N-3</b>  | AAGTCGACTTAGACTGTGCGTTTTCCCTTTCTGA |
| <b>G-HYL1-5</b>    | CAAGGATCCACAATGACCTCCACTGATGT      |
| <b>G-HYL1-3</b>    | AAGGTACCGCGTGGCTTGCTTC             |
| <b>G-HYL1D1-3</b>  | AAGGTACCGATTTTGCTAATTC             |
| <b>G-HYL1D12-3</b> | AAGGTACCTCTGACTGGATCGC             |
| <b>G-HYL1D1N-3</b> | AAGGTACCACTGTGCGTTTTCC             |
| <b>pHYL1-S1</b>    | AAGAATTCAGCAACCATCTTCGTCGT         |
| <b>pHYL1-A1</b>    | AAGGATTCTTTCACGAGCAGAATGT          |
| <b>E-HYL1D1-5</b>  | ATGACCTCCACTGATGTTTCCTCTG          |
| <b>E-HYL1D1-3</b>  | GGCTTAGCTCACTGGATTTTGCT            |
| <b>E-HYL1D12-3</b> | GTCTGACTGGATCGCTAAAAGAG            |
| <b>dsRBD1-3</b>    | GGATTTTGCTAATTCCCGGT               |
| <b>dsRBD2-3</b>    | TTCTGACTGGATCGCTAAAAG              |
| <b>ARF17-5</b>     | AGCACCTGATCCAAGTCCTTCTATG          |
| <b>ARF17-3</b>     | TGGTGAATAGCTGGGGAGGATTC            |
| <b>REV-5</b>       | GAATAGTCCTGCTGGATTGCTCTCA          |
| <b>REV-3</b>       | AACTTCAAGGCTCCTACAGTCACG-3         |
| <b>UBQ5-5</b>      | CTTCATCTCGTCCCTCCGTCTC             |
| <b>UBQ5-3</b>      | GCTTAACCTTCTTATGCTTGTG             |
| <b>166a-5F'</b>    | AGGGGCTTTCTCTTTTGAGGGGACTGTTGTCT   |
| <b>166a-5F</b>     | TGAGG(A)GGAATGTTGTCTGGC            |
| <b>166a-7R</b>     | CCTCATCATTACACCAATCTGC             |
